# Supplementary material for: Mobile Health Solutions for Hypertensive Disorders in Pregnancy: Scoping Literature Review
Source: PubMed Central journal article supplement (PMC6000483; doi:10.2196/mhealth.9671), 2018-05-30
Supplement: mhealth_v6i5e130_app1.pdf [file mhealth_v6i5e130_app1.pdf]

Table 1: Summary of articles: publication data

| <b>Article</b> | <b>Journal abbrev.</b>         | <b>Pub. Year</b> | <b>Ranking</b> | <b>Category *</b> |
|----------------|--------------------------------|------------------|----------------|-------------------|
| [69]           | J. Obstetric & Gyn. Can.       | 2013             |                | Ed                |
| [84]           | Int. J. Med. Inform.           | 2015             | Q1             | DSS               |
| [85]           | Methods Inf. Med.              | 2015             | Q1             | D&M               |
| [86]           | Methods Inf. Med.              | 2014             | Q1             | D&M DSS           |
| [87]           | Prev. Med. Rep.                | 2016             |                | HP                |
| [88]           | Stud. Health Tec. Inf.         | 2016             |                | D&M HP            |
| [89]           | J. Am. Med. Inform. Assn.      | 2015             | Q1             | D&M               |
| [90]           | JMIR Res. Protoc.              | 2016             |                | D&M               |
| [91]           | Contemp. Clin. Trials<br>Comm. | 2016             |                | HP                |
| [92]           | Hypertens. Pregnancy           | 2015             | Q4             | Ed                |
| [93]           | Metas Enf                      | 2016             |                | HP                |

\* Category code: Ed: Education; DSS: Decision Support System; D&M: Diagnosis and Monitoring; HP: Health Promotion.

Table 2: Information regarding interventions

| <b>Article</b> | <b>Type of intervention</b>        | <b>Country</b> | <b>Context</b>   | <b>Num. Participants</b>                                                          |
|----------------|------------------------------------|----------------|------------------|-----------------------------------------------------------------------------------|
| [69]           | Prospective Study                  | Canada         | Home<br>Clinical | 18 pregnant women                                                                 |
| [84]           | Qualitative Research               | Italy<br>Spain | Unknown          | 29 patients<br>(10 Atrial fibrillation patients + 19 GDM women)<br>Care providers |
| [85]           | Database Analysis                  | Germany        | Clinical         | 910 cases                                                                         |
| [86]           | Observational                      | Denmark        | Clinical         | 41 patients                                                                       |
| [87]           | RCT                                | USA            | Daily            | 80 inactive pregnant women                                                        |
| [88]           | Usability Study                    | Korea          | Unknown          | Unknown                                                                           |
| [89]           | Multistage tests                   | Germany        | Unknown          | 218 first stage<br>273 second stage                                               |
| [90]           | Prospective<br>Observational trial | USA            | Home             | 6 pregnant women                                                                  |
| [91]           | RCT                                | Puerto Rico    | Home<br>Clinical | 200                                                                               |
| [92]           | Website Evaluations                | USA            | N/A              | 114 websites                                                                      |
| [93]           | Review                             | N/A            | N/A              | N/A                                                                               |

Table 3: Type of ICT solution

| <b>Article</b> | <b>Software</b> | <b>Platform</b> | <b>Sensors</b> | <b>Users</b> |
|----------------|-----------------|-----------------|----------------|--------------|
| [69]           | Web             | N/A             | None           | Patients     |

|      |                                   |         |                                               |                        |
|------|-----------------------------------|---------|-----------------------------------------------|------------------------|
| [84] | Mobile                            | Unknown | None                                          | Patients<br>Physicians |
| [85] | Web                               | N/A     | None                                          | Physicians             |
| [86] | Mobile<br>(Tablet app)<br><br>Web | Android | Blood pressure<br>Context sensors             | Patients<br>Physicians |
| [87] | Mobile<br>Web                     | Unknown | Movement sensors                              | Patients               |
| [88] | Mobile                            | Android | None                                          | Patients               |
| [89] | Mobile                            | iOS     | None                                          | Patients<br>Physicians |
| [90] | Mobile                            | iOS     | Digital weight<br>scale<br><br>Blood pressure | Patients               |
| [91] | Other                             | Unknown | Pedometer                                     | Patients               |
| [92] | Web                               | N/A     | None                                          | Patients               |
| [93] | Mobile (N/A)                      | N/A     | N/A                                           | Patients               |

Table 4: Features of ICT solution

| <b>Article</b> | <b>Features</b>                                                                                                 | <b>Communication</b>                                   | <b>Content<br/>Confidence</b> |
|----------------|-----------------------------------------------------------------------------------------------------------------|--------------------------------------------------------|-------------------------------|
| [69]           | Education (placental knowledge)                                                                                 | N/A                                                    | Experts                       |
| [84]           | Clinical guideline-based<br>recommendations<br>Decision support system<br>Semantic data integration into<br>PHR | Notifications<br>(patients)<br><br>Alerts (physicians) | Clinical guidelines           |

|      |                                                                                                       |                                               |                                              |
|------|-------------------------------------------------------------------------------------------------------|-----------------------------------------------|----------------------------------------------|
|      | Intelligent data analysis                                                                             |                                               |                                              |
| [85] | Documentation                                                                                         | N/A                                           | Scientific committee                         |
| [86] | Adherence model<br>User interface<br>Data processing<br>Communication<br>Audio context classification | N/A                                           | N/A                                          |
| [87] | Monitoring of physical activity                                                                       | Notifications                                 | N/A                                          |
| [88] | Management of metabolic syndrome                                                                      | Unknown                                       | Unknown                                      |
| [89] | Diagnosis through image processing                                                                    | Mail                                          | N/A                                          |
| [90] | Educational information                                                                               | Notifications (patients)<br>Mail (physicians) | 3 board-certified obstetrician-gynecologists |
| [91] | Education                                                                                             | N/A                                           | Experts                                      |
| [92] | Patient educational materials                                                                         | N/A                                           | N/A                                          |
| [93] | Use of SMS                                                                                            | N/A                                           | N/A                                          |
